# Supplementary material for: Proton NMR Enables the Absolute Quantification of Aqueous Metabolites and Lipid Classes in Unique Mouse Liver Samples
Source: MDPI journal article supplement (doi:10.3390/metabo10010009), 2019-12-21
Supplement: s1 [file s1]

**Table S2.** Compounds identified in the non-polar extract of mouse liver tissue from NMR data : assigned chemical shifts and multiplicities<sup>a</sup>

| Compound Name                            | Assignment, <sup>1</sup> H NMR Chemical Shift (ppm), Multiplicity, Coupling constants (Hz)                                                                                                                                       |
|------------------------------------------|----------------------------------------------------------------------------------------------------------------------------------------------------------------------------------------------------------------------------------|
| <b>Cholesterol ester</b>                 | C-18 H3 (0.68, s); <b>C-19 H3 (1.02,s)</b>                                                                                                                                                                                       |
| <b>Fatty acid chain</b>                  | CH3 SFA(0.88,t,J=6.5); CH3 w-6 (0.90, t, J=6.5); <b>CH3 w-3 (0.97, t, J=6.5)</b> ; (CH2) <sub>n</sub> (1.2-1.4, m); CH2-C-CH=(1.75, m); CH2-CH=(1.98-2.09,m); CH2-CO(2.24-2.35,m); =CH-CH2-CH=(2.74-2.90,m); CH=CH(5.30-5.42, m) |
| <b>Free cholesterol</b>                  | C-18 H3(0.68,s); <b>C-19 H3 (1.01,s)</b>                                                                                                                                                                                         |
| <b>Glycerophospholipid backbone</b>      | C-3 H2 (3.94,m); <b>C-2H (5.17-5.24, m)</b>                                                                                                                                                                                      |
| <b>Phosphatidylcholine</b>               | <b>N(CH3)3 (3.20,s)</b>                                                                                                                                                                                                          |
| <b>Phosphatidyl ethanolamine</b>         | <b>N-CH2 (3.12,m)</b>                                                                                                                                                                                                            |
| <b>Sphingomyelin</b>                     | N(CH3) <sub>3</sub> (3.23,s); <b>CH=CH (5.70,m)</b>                                                                                                                                                                              |
| <b>Total cholesterol</b>                 | <b>C-18 H3 (0.68,s)</b>                                                                                                                                                                                                          |
| <b>Triglycerides (glycerol backbone)</b> | C-1 H2/ C-3 H2 (4.15,dd, J=12 and 6 / <b>4.29,dd, 12 and 4.2</b> ); C-2 H (5.27,m)                                                                                                                                               |

<sup>a</sup>Lipid classes quantified and signals used for lipid quantifications are given in bold
