# Supplementary material for: Proton NMR Enables the Absolute Quantification of Aqueous Metabolites and Lipid Classes in Unique Mouse Liver Samples
Source: MDPI journal article supplement (doi:10.3390/metabo10010009), 2019-12-21
Supplement: s1 [file s1]

**Table S1.** Compounds identified in the polar extract of mouse liver tissue from NMR data : assigned chemical shifts and multiplicities<sup>a</sup>

| Compound Name            | <sup>1</sup> H NMR Chemical Shift (ppm), Multiplicity, Coupling constants (Hz)                                                                                      |
|--------------------------|---------------------------------------------------------------------------------------------------------------------------------------------------------------------|
| <b>3-Hydroxybutyrate</b> | <b>1.20</b> (d, J=6.4); 2.31 (dd, J=14.3 and 6.1); 2.41 (dd, J=14.3 and 7.6); 4.15 (m)                                                                              |
| <b>Acetate</b>           | <b>1.93</b> (s)                                                                                                                                                     |
| <b>Alanine</b>           | <b>1.48</b> (d, J=7.2); 3.78 (q, J=7.2)                                                                                                                             |
| Aspartate                | 2.68(dd, J=17.6 and 8.4); 2.82(dd, J=17.6 and 3.6); 3.90(m)                                                                                                         |
| <b>Choline</b>           | <b>3.21</b> (s); 3.53(m); 4.07(m)                                                                                                                                   |
| <b>Creatine</b>          | <b>3.04</b> (s); 3.93(s)                                                                                                                                            |
| Ethanol                  | 1.19(t, J=7.1); 3.66(q, J=7.1)                                                                                                                                      |
| <b>Formate</b>           | <b>8.46</b> (s)                                                                                                                                                     |
| <b>Glucose</b>           | 3.25(dd, J=8 and 9); 3.41(m); 3.48(m); <b>3.54</b> (dd, J=9.5 and 3.6); 3.72(m); 3.77(m); 3.84(m); <b>3.90</b> (dd, J=12.3 and 2.2); 4.65(d, J=7.8); 5.24(d, J=3.7) |
| <b>Glutamate</b>         | 2.06(m); 2.12(m); <b>2.36</b> (m); 3.77(m)                                                                                                                          |
| <b>Glutamine</b>         | 2.15(m); <b>2.46</b> (m); 3.78(m)                                                                                                                                   |
| <b>Glutathione</b>       | 2.18(m); <b>2.56</b> (m); 2.97(m); 3.29(m); 3.78(m)                                                                                                                 |
| <b>Glycerol</b>          | 3.56(dd, J=11.6 and 6.5); <b>3.66</b> (dd, J=11.6 and 4.3); 3.78(m)                                                                                                 |
| Glycerophosphocholine    | 3.23(s); 3.62(m); 3.68(m); 3.92(m); 4.33(m)                                                                                                                         |
| <b>Glycine</b>           | <b>3.56</b> (s)                                                                                                                                                     |
| Inosine monophosphate    | 4.02(m); 4.38(m); 4.51(m); 6.15(d, J=5.7); 8.24(s); 8.53(s)                                                                                                         |
| <b>Inosine</b>           | 4.28(m); 4.44(m); <b>6.11</b> (d, J=5.6); 8.24(s); 8.35(s)                                                                                                          |
| <b>Isoleucine</b>        | 0.94(t, J=6.8); <b>1.015</b> (d, J=6.8); 1.27(m); 1.47(m); 1.99(m); 3.68(d, J=4)                                                                                    |
| <b>Lactate</b>           | 1.33(d, J=7); <b>4.11</b> (q, J=7)                                                                                                                                  |
| <b>Leucine</b>           | <b>0.965</b> (t, J=6.4); 1.72(m); 3.74(m)                                                                                                                           |
| <b>Methionine</b>        | 2.12(m); 2.13(s); 2.20(m); <b>2.65</b> (t, J=7.6); 3.86(m)                                                                                                          |
| <b>Niacinamide</b>       | 8.94(d, J=2); 8.72(dd, J=5 and 2); 8.25(m); <b>7.60</b> (m)                                                                                                         |
| <b>Phenylalanine</b>     | 3.15(m); 3.29(m); 4.0(m); 7.33(d, J=7.6); 7.38(t, J=7.6); <b>7.43</b> (t, J=7.6)                                                                                    |
| <b>Succinate</b>         | <b>2.42</b> (s)                                                                                                                                                     |
| <b>Taurine</b>           | <b>3.27</b> (t, J=6.8); 3.43(t, J=6.8)                                                                                                                              |
| <b>Threonine</b>         | 1.33(d, J=7); 3.60(d, J=4.4); <b>4.26</b> (m)                                                                                                                       |
| <b>Tyrosine</b>          | 3.07(m); 3.20(m); 3.95(m); <b>6.90</b> (d, J=8.4); 7.20(d, J=8.4)                                                                                                   |
| <b>Uridine</b>           | 4.23(t, J=5.2); 4.36(t, J=5.2); <b>5.91</b> (m); 7.88(d, J=8.2)                                                                                                     |
| <b>Valine</b>            | <b>0.99</b> (d, J=7); 1.05(d, J=7); 2.28(m); 3.62(d, J=4.2)                                                                                                         |

<sup>a</sup>Metabolites quantified and signals used for quantifications are given in bold
