# Supplementary material for: Proton NMR Enables the Absolute Quantification of Aqueous Metabolites and Lipid Classes in Unique Mouse Liver Samples
Source: MDPI journal article supplement (doi:10.3390/metabo10010009), 2019-12-21
Supplement: s1 [file s1]

**Table S3.** Composition of lipid mixtures

| Compound                  | Concentration (mmol/l) |      |      |      |      |      |      |      |      |       |
|---------------------------|------------------------|------|------|------|------|------|------|------|------|-------|
|                           | Mix1                   | Mix2 | Mix3 | Mix4 | Mix5 | Mix6 | Mix7 | Mix8 | Mix9 | Mix10 |
| Cholesterol               | 0.62                   | 0.77 | 0.45 | 0.36 | 0.15 | ---  | ---  | ---  | ---  | ---   |
| Cholesterol oleate        | 0.35                   | 0.47 | 0.20 | 0.16 | 0.07 | ---  | ---  | ---  | ---  | ---   |
| Triglycerides (C17:0)     | 0.31                   | 1.28 | 1.80 | 2.88 | 3.08 | ---  | ---  | ---  | ---  | ---   |
| Linoleic acid             | 1.74                   | 2.32 | 1.22 | 0.81 | 0.35 | ---  | ---  | ---  | ---  | ---   |
| Docosahexaenoic acid      | 0.91                   | 1.22 | 0.64 | 0.43 | 0.18 | ---  | ---  | ---  | ---  | ---   |
| Phosphatidylcholine       | ---                    | ---  | ---  | ---  | ---  | 0.68 | 0.85 | 1.02 | 1.36 | 1.53  |
| Phosphatidyl-ethanolamine | ---                    | ---  | ---  | ---  | ---  | 0.15 | 0.12 | 0.10 | 0.07 | 0.05  |
| Sphingomyelin             | ---                    | ---  | ---  | ---  | ---  | 0.20 | 0.15 | 0.10 | 0.07 | 0.05  |
