# Supplementary material for: Proton NMR Enables the Absolute Quantification of Aqueous Metabolites and Lipid Classes in Unique Mouse Liver Samples
Source: Metabolites. 2019 Dec 21;10(1):9. doi: 10.3390/metabo10010009 (PMC7023327; doi:10.3390/metabo10010009)
Supplement: Supplementary file 1 [file metabolites-10-00009-s001.zip]

Archive with 17 entries (17 files):
- FigureS10modified.png
- FigureS1modified.png
- FigureS2modified.png
- FigureS3modified.png
- FigureS4modified.png
- FigureS5modified.png
- FigureS6modified.png
- FigureS7modified.png
- FigureS8modified.png
- FigureS9modified.png
- TableS1.pdf
- TableS2.pdf
- TableS3.pdf
- TableS4.xlsx
- TableS5.xlsx
- TableS6.xlsx
- TableS7.xlsx
