# Supplementary material for: Proton NMR Enables the Absolute Quantification of Aqueous Metabolites and Lipid Classes in Unique Mouse Liver Samples
Source: Metabolites. 2019 Dec 21;10(1):9. doi: 10.3390/metabo10010009 (PMC7023327; doi:10.3390/metabo10010009)
Supplement: Supplementary file 1 [file metabolites-10-00009-s001.zip › TableS4.xlsx]

## Sheet: TSP CDCl3-CD3OD
	Triglycerides concentration	Triglycerides NMR	DHA concentration	DHA NMR	Linoleic acid concentration	Linoleic acid NMR	Cholesterol concentration	Cholesterol NMR	Cholesterol ester concentration	Cholesterol ester NMR	Saturated FA concentration	Saturated FA NMR	MUFA concentration	MUFA NMR	PUFA concentration	PUFA NMR	w-3 FA concentration	w-3 FA NMR	Total cholesterol concentration	Total cholesterol NMR	Total FA concentration	Total FA NMR	Unsaturated FA concentration	Unsaturated FA NMR	Phosphatidylcholine concentration	Phosphatidylcholine NMR	Phosphatidyl-ethanolamine concentration	Phosphatidyl-ethanolamine NMR	Sphingomyelin concentration	Sphingomyelin NMR	Total Phospholipids concentration	Total Phospholipids NMR
Sol.1/sol.6	0.3081	0.3603	0.9132	0.897105	1.7415	1.66331	0.61824	0.69322	0.34995	0.300266	0.9243	0.817186	0.34995	0.382927	2.6547	2.68476	0.9132	0.886489	0.96819	1.16463	3.92895	3.88487	3.00465	3.06769	0.682	0.678197	0.14865	0.12727	0.1973	0.181107	1.02795	1.04108
Sol.2/sol.7	1.28375	1.299	1.2176	1.24794	2.322	2.21742	0.7728	0.778041	0.4666	0.430662	3.85125	3.68449	0.4666	0.529839	3.5396	3.66247	1.2176	1.19524	1.2394	1.24818	7.85745	7.8768	4.0062	4.19231	0.8525	0.926771	0.123875	0.121156	0.147975	0.153817	1.12435	1.10922
Sol.3/sol.8	1.7972	1.816	0.63924	0.608394	1.21905	1.21318	0.4508	0.467214	0.204137	0.216179	5.39175	5.29525	0.204137	0.224749	1.85829	2.19227	0.63924	0.67435	0.654937	0.692094	7.45418	7.71227	2.06243	2.41702	1.023	1.12059	0.0991	0.106041	0.09865	0.106125	1.22075	1.22928
Sol.4/sol.9	2.875	2.911	0.42616	0.401226	0.8127	0.830921	0.36064	0.39055	0.16331	0.153809	8.6268	8.9561	0.16331	0.191505	1.23886	1.26223	0.42616	0.4473	0.52395	0.570376	10.029	10.4098	1.40217	1.45374	1.364	1.50654	0.074325	0.0894857	0.069055	0.0707866	1.50738	1.50439
Sol.5/sol.10	3.081	3.057	0.18264	0.146349	0.3483	0.357889	0.15456	0.154591	0.06999	0.0620848	9.243	9.29006	0.06999	0.0710142	0.53094	0.622593	0.18264	0.195132	0.22455	0.227499	9.84393	9.98367	0.60093	0.693608	1.5345	1.69436	0.04955	0.06552	0.049325	0.0594988	1.63338	1.61988

## Sheet: TMS CDCL3-CD3OD
	Triglycerides concentration	Triglycerides NMR	DHA concentration	DHA NMR	Linoleic acid concentration	Linoleic acid NMR	Cholesterol concentration	Cholesterol NMR	Cholesterol ester concentration	Cholesterol ester NMR	Saturated FA concentration	Saturated FA NMR	MUFA concentration	MUFA NMR	PUFA concentration	PUFA NMR	w-3 FA concentration	w-3 FA NMR	Total cholesterol concentration	Total cholesterol NMR	Total FA concentration	Total FA NMR	Unsaturated FA concentration	Unsaturated FA NMR	Phosphatidylcholine concentration	Phosphatidylcholine NMR	Phosphatidyl-ethanolamine concentration	Phosphatidyl-ethanolamine NMR	Sphingomyelin concentration	Sphingomyelin NMR	Total Phospholipids concentration	Total Phospholipids NMR
Sol.1/sol.6	0.5135	0.721971	1.522	1.18667	2.9025	3.02395	1.0304	1.53317	0.58325	0.562041	1.5405	-0.298083	0.58325	0.609634	4.4245	6.99572	1.522	1.63037	1.61365	2.48887	6.54825	7.30727	5.00775	7.60535	0.682	0.712163	0.14865	0.118087	0.1973	0.172264	1.02795	0.993773
Sol.2/sol.7	1.28375	1.39015	1.2176	0.949171	2.322	2.34699	0.7728	0.735728	0.4666	0.386554	3.85125	2.06906	0.4666	0.476025	3.5396	5.35675	1.2176	1.09788	1.2394	1.39174	7.85745	7.90184	4.0062	5.83277	0.8525	0.945753	0.123875	0.0880243	0.147975	0.114471	1.12435	1.07613
Sol.3/sol.8	2.5675	2.28007	0.9132	0.770103	1.7415	1.89708	0.644	0.70054	0.291625	0.262535	7.7025	4.70091	0.291625	0.275816	2.6547	5.34405	0.9132	0.92482	0.935625	1.01367	10.6488	10.3208	2.94632	5.61987	1.023	1.05914	0.0991	0.0755222	0.09865	0.0701827	1.22075	1.20518
Sol.4/sol.9	4.108	4.20253	0.6088	0.52798	1.161	1.37669	0.5152	0.619151	0.2333	0.218307	12.324	11.6555	0.2333	0.229924	1.7698	3.07999	0.6088	0.619566	0.7485	0.953646	14.3271	14.9654	2.0031	3.30991	1.364	1.51103	0.074325	0.06912	0.069055	0.0460253	1.50738	1.54802
Sol.5/sol.10	5.135	5.51146	0.3044	0.292784	0.5805	0.672399	0.2576	0.318344	0.11665	0.12928	15.405	17.1134	0.11665	0.144428	0.8849	1.44978	0.3044	0.315003	0.37425	0.435482	16.4065	18.7076	1.00155	1.59421	1.5345	1.67775	0.04955	0.0666274	0.049325	0.0601862	1.63338	1.69997

## Sheet: TSP CDCl3
	Triglycerides concentration	Triglycerides NMR	DHA concentration	DHA NMR	Linoleic acid concentration	Linoleic acid NMR	Cholesterol concentration	Cholesterol NMR	Cholesterol ester concentration	Cholesterol ester NMR	Saturated FA concentration	Saturated FA NMR	MUFA concentration	MUFA NMR	PUFA concentration	PUFA NMR	w-3 FA concentration	w-3 FA NMR	Total cholesterol concentration	Total cholesterol NMR	Total FA concentration	Total FA NMR	Unsaturated FA concentration	Unsaturated FA NMR	Phosphatidylcholine concentration	Phosphatidylcholine NMR	Phosphatidyl-ethanolamine concentration	Phosphatidyl-ethanolamine NMR	Sphingomyelin concentration	Sphingomyelin NMR	Total Phospholipids concentration	Total Phospholipids NMR
Sol.1/sol.6	0.5135	0.556023	1.522	1.6423	2.9025	2.61777	1.0304	1.02045	0.58325	0.490295	1.5405	2.04727	0.58325	0.638575	4.4245	3.63289	1.522	1.50772	1.61365	1.97265	6.54825	6.31873	5.00775	4.27146	0.682	0.962404	0.14865	0.0871913	0.1973	0.141406	1.02795	1.16126
Sol.2/sol.7	1.28375	1.07558	1.2176	1.4083	2.322	2.43358	0.7728	0.542243	0.4666	0.412304	3.85125	3.1615	0.4666	0.545365	3.5396	4.08419	1.2176	1.41391	1.2394	1.39172	7.85745	7.79105	4.0062	4.62956	0.8525	0.905058	0.123875	0.0956349	0.147975	0.144729	1.12435	1.01411
Sol.3/sol.8	2.5675	2.5635	0.9132	1.03492	1.7415	1.54416	0.644	0.52536	0.291625	0.257929	7.7025	7.35514	0.291625	0.365591	2.6547	2.7584	0.9132	0.928833	0.935625	1.14367	10.6488	10.4791	2.94632	3.12399	1.023	1.02839	0.0991	0.0840088	0.09865	0.0689367	1.22075	1.12286
Sol.4/sol.9	4.108	4.305	0.6088	0.697726	1.161	1.17951	0.5152	0.42187	0.2333	0.196477	12.324	12.452	0.2333	0.220783	1.7698	2.3761	0.6088	0.670391	0.7485	0.895356	14.3271	15.0489	2.0031	2.59688	1.364	1.66837	0.074325	0.071345	0.069055	0.0651286	1.50738	1.40184
Sol.5/sol.10	5.135	6.31516	0.3044	0.343973	0.5805	0.576077	0.2576	0.223635	0.11665	0.102283	15.405	18.943	0.11665	0.111343	0.8849	1.11044	0.3044	0.346683	0.37425	0.419221	16.4065	20.1648	1.00155	1.22178	1.5345	1.83185	0.04955	0.0840424	0.049325	0.0314952	1.63338	1.67964

## Sheet: TMS CDCL3
	Triglycerides concentration	Triglycerides NMR	DHA concentration	DHA NMR	Linoleic acid concentration	Linoleic acid NMR	Cholesterol concentration	Cholesterol NMR	Cholesterol ester concentration	Cholesterol ester NMR	Saturated FA concentration	Saturated FA NMR	MUFA concentration	MUFA NMR	PUFA concentration	PUFA NMR	w-3 FA concentration	w-3 FA NMR	Total cholesterol concentration	Total cholesterol NMR	Total FA concentration	Total FA NMR	Unsaturated FA concentration	Unsaturated FA NMR	Phosphatidylcholine concentration	Phosphatidylcholine NMR	Phosphatidyl-ethanolamine concentration	Phosphatidyl-ethanolamine NMR	Sphingomyelin concentration	Sphingomyelin NMR	Total Phospholipids concentration	Total Phospholipids NMR
Sol.1/sol.6	0.5135	0.986852	1.522	2.77645	2.9025	4.65198	1.0304	1.5939	0.58325	0.750185	1.5405	2.48297	0.58325	1.12008	4.4245	7.47534	1.522	2.65284	1.61365	3.67959	6.54825	11.0784	5.00775	8.59542	0.682	0.925822	0.14865	0.0819893	0.1973	0.170796	1.02795	0.918035
Sol.2/sol.7	1.28375	1.05309	1.2176	1.38254	2.322	2.39128	0.7728	0.582411	0.4666	0.466514	3.85125	2.81108	0.4666	0.510425	3.5396	4.28417	1.2176	1.38564	1.2394	1.3087	7.85745	7.60568	4.0062	4.7946	0.8525	0.874979	0.123875	0.0771811	0.147975	0.0992736	1.12435	0.950603
Sol.3/sol.8	2.5675	2.16127	0.9132	0.833177	1.7415	1.24129	0.644	0.459158	0.291625	0.23432	7.7025	5.7308	0.291625	0.385367	2.6547	2.70727	0.9132	0.852526	0.935625	0.907108	10.6488	8.82344	2.94632	3.09264	1.023	1.11587	0.0991	0.0716256	0.09865	0.0770342	1.22075	1.093
Sol.4/sol.9	4.108	3.75067	0.6088	0.574424	1.161	1.02765	0.5152	0.387072	0.2333	0.199783	12.324	10.9988	0.2333	0.250766	1.7698	2.28085	0.6088	0.588741	0.7485	0.757751	14.3271	13.5304	2.0031	2.53162	1.364	1.49222	0.074325	0.0649944	0.069055	0.0435542	1.50738	1.23002
Sol.5/sol.10	5.135	5.46126	0.3044	0.323533	0.5805	0.515644	0.2576	0.202524	0.11665	0.0947318	15.405	16.9262	0.11665	0.0962658	0.8849	1.11574	0.3044	0.31792	0.37425	0.376272	16.4065	18.1382	1.00155	1.212	1.5345	1.87718	0.04955	0.0586699	0.049325	0.0235699	1.63338	1.59808
