# Supplementary material for: Proton NMR Enables the Absolute Quantification of Aqueous Metabolites and Lipid Classes in Unique Mouse Liver Samples
Source: Metabolites. 2019 Dec 21;10(1):9. doi: 10.3390/metabo10010009 (PMC7023327; doi:10.3390/metabo10010009)
Supplement: Supplementary file 1 [file metabolites-10-00009-s001.zip › TableS5.xlsx]

## Sheet: Cholesterol-TG
Sample	TC GC	TC NMR	FC GC	FC NMR	CE GC	CE NMR	TG GC	TG NMR
11	10.71	10.6193	5.98	6.12256	4.73	4.4967	31.63	39.0544
12	8.28	8.23778	4.52	4.91791	3.76	3.31986	43.75	44.4616
13	7.73	7.90902	4.49	4.51881	3.24	3.39021	26.24	24.4258
14	9.55	9.09055	5.3	5.12381	4.25	3.96673	34.88	35.6064
16	9.92	9.5323	5.39	5.38771	4.53	4.14458	25.23	24.0818
31	5.15	4.89776	4.55	3.79593	0.6	1.10183	4.83	5.23692
32	5.57	5.59186	4.34	4.13614	1.23	1.45572	18.89	19.0859
33	4.89	4.96018	3.94	3.61995	0.95	1.34022	12.28	13.133
34	4.9	4.73024	4.17	3.8229	0.73	0.907342	11.11	11.8438
36	6.07	6.03825	4.91	4.35458	1.16	1.68367	17.48	18.125
37	5.26	4.91857	3.99	3.63366	1.27	1.28491	15.36	14.7234
51	4.88	5.13035	4.32	4.6364	0.56	0.493947	7.14	8.55675
52	6.25	5.70076	5.61	5.34939	0.64	0.351375	7.27	8.26866
56	5.47	5.34417	4.55	4.49543	0.92	0.84874	9.97	13.8022
57	4.94	4.91762	4.22	4.20638	0.72	0.774789	12.52	12.8203
59	5.51	5.18831	4.66	4.58716	0.85	0.607257	9.22	9.44563

## Sheet: Fatty acids
Sample	Total FA GC	Total FA NMR	SFA GC	SFA NMR	w-3 FA GC	w-3 FA NMR	EPA+ARA GC	EPA+ARA NMR	DHA GC	DHA NMR	MUFA GC	MUFA NMR	PUFA GC	PUFA NMR	U GC	U RMN	linoleic acid GC	linoleic acid NMR	MUFA/PUFA GC	MUFA/PUFA NMR
11	149	165.432	43	47.8844	2	2.20669	7	8.05153	2	1.86967	84	88.3626	22	29.1849	106	117.548	4	3.74303	3.869	3.02768
12	164	168.387	47	44.8176	4	1.98078	8	7.49986	2	1.71385	94	100.875	22	22.6944	116	123.57	4	4.09455	4.199	4.44494
13	124	119.521	38	37.6862	2	1.85165	6	5.56536	2	1.45687	67	65.223	18	16.6122	85	81.8352	5	3.85687	3.669	3.92621
14	181	172.335	53	45.9008	2	1.57575	7	6.06138	2	1.67338	107	95.6589	21	30.7754	128	126.434	4	3.87097	5.103	3.10829
15	132	166.529	40	49.0811	2	2.34174	8	8.18668	2	1.57867	69	95.0958	23	22.3519	92	117.448	6	4.77851	2.984	4.25448
16	127	117.524	38	37.1439	4	2.20129	5	6.17354	2	1.72267	65	61.7277	24	18.6526	89	80.3802	6	5.48266	2.707	3.30934
31	74	66.8381	27	24.0924	4	3.44348	10	9.10879	4	2.62537	18	13.989	29	28.7567	47	42.7458	12	9.95957	0.638	0.48646
32	93	100.789	25	28.5942	4	6.02492	7	7.57124	3	4.39762	44	36.5013	24	35.6934	68	72.1947	11	13.5606	1.852	1.02263
33	103	97.9655	31	29.3325	21	4.81607	26	11.0716	3	3.24464	30	31.4239	42	37.2091	72	68.633	10	10.4817	0.707	0.844523
34	93	89.9011	31	30.6167	5	5.45356	11	10.7235	5	3.51022	26	23.3929	35	35.8915	61	59.2844	17	15.917	0.749	0.651765
36	130	124.935	43	39.2248	6	6.9804	13	11.7286	6	4.68902	42	36.2993	45	49.4108	87	85.7101	23	21.9222	0.946	0.734644
37	108	88.3316	36	29.7657	4	3.9201	11	10.1566	4	2.6964	39	32.21	33	26.3559	72	58.5659	13	10.9448	1.182	1.22212
51	111	90.9151	40	33.0683	22	17.4604	8	6.65428	18	13.5856	28	20.9039	43	36.9429	71	57.8468	15	12.1461	0.637	0.565845
52	69	74.9357	24	26.9584	9	17.8837	4	6.61181	7	11.3511	25	18.1128	20	29.8644	45	47.9773	7	10.0024	1.288	0.606502
56	122	118.459	45	43.109	22	22.5951	8	8.28587	17	15.3617	34	30.5737	43	44.7761	77	75.3499	16	15.8474	0.803	0.682813
57	101	98.1591	37	35.0982	19	18.2681	7	4.09002	15	14.0305	27	25.0157	37	38.0452	64	63.0609	13	12.1223	0.746	0.657526
59	96	93.1082	36	35.5791	16	16.3017	4	1.87461	13	12.4334	24	23.0096	35	34.5195	59	57.5291	14	13.1849	0.699	0.666567
