# Supplementary material for: Proton NMR Enables the Absolute Quantification of Aqueous Metabolites and Lipid Classes in Unique Mouse Liver Samples
Source: Metabolites. 2019 Dec 21;10(1):9. doi: 10.3390/metabo10010009 (PMC7023327; doi:10.3390/metabo10010009)
Supplement: Supplementary file 1 [file metabolites-10-00009-s001.zip › TableS6.xlsx]

## Sheet: export_bucket_foie_aq_HG_300819
Sample	8.995	8.985	8.975	8.965	8.955	8.945	8.935	8.925	8.915	8.905	8.895	8.885	8.875	8.865	8.855	8.845	8.835	8.825	8.815	8.805	8.795	8.785	8.775	8.765	8.755	8.745	8.735	8.725	8.715	8.705	8.695	8.685	8.675	8.665	8.655	8.645	8.635	8.625	8.615	8.605	8.595	8.585	8.575	8.565	8.555	8.545	8.535	8.525	8.515
11	1.273e-05	9.77e-06	1.043e-05	1.115e-05	2.034e-05	0.00038463	6.646e-05	8.52e-06	1.049e-05	8e-06	1.032e-05	8.42e-06	1.657e-05	9.22e-06	1.801e-05	1.353e-05	1.632e-05	1.45e-05	1.237e-05	1.503e-05	1.249e-05	6.57e-06	1.152e-05	1.018e-05	1.795e-05	7.85e-06	1.07e-05	0.00023131	0.00031607	3.928e-05	1.403e-05	1.1e-05	1.169e-05	1.556e-05	1.702e-05	1.673e-05	7.8e-06	1.45e-05	1.445e-05	1.502e-05	1.195e-05	1.563e-05	4.069e-05	0.00023099	2.054e-05	2.749e-05	1.337e-05	1.096e-05	2.825e-05
12	1.516e-05	1.345e-05	1.626e-05	1.092e-05	3.626e-05	0.00050439	5.853e-05	1.524e-05	1.08e-05	1.102e-05	1.746e-05	1.771e-05	1.276e-05	1.382e-05	1.352e-05	8.77e-06	1.261e-05	1.885e-05	1.372e-05	1.99e-05	1.431e-05	1.438e-05	1.258e-05	1.643e-05	1.669e-05	1.882e-05	1.553e-05	0.00030047	0.00035884	4.125e-05	1.628e-05	1.58e-05	1.359e-05	1.351e-05	1.911e-05	2.716e-05	1.653e-05	1.533e-05	1.47e-05	1.803e-05	1.747e-05	3.304e-05	0.00033236	0.00011022	1.889e-05	3.359e-05	1.796e-05	1.941e-05	4.352e-05
13	1.638e-05	1.595e-05	1.911e-05	1.251e-05	3.324e-05	0.00044699	0.00010106	2.831e-05	1.815e-05	1.455e-05	2.08e-05	2.301e-05	2.147e-05	2.247e-05	1.623e-05	1.353e-05	2.328e-05	1.983e-05	1.76e-05	1.964e-05	2.217e-05	1.965e-05	1.65e-05	2.439e-05	2.094e-05	2.395e-05	1.486e-05	0.00021079	0.00031984	3.25e-05	2.617e-05	2.167e-05	2.306e-05	2.24e-05	2.204e-05	2.215e-05	1.277e-05	1.714e-05	2.493e-05	1.82e-05	2.862e-05	0.00024414	2.052e-05	2.315e-05	1.59e-05	1.973e-05	1.71e-05	1.937e-05	3.046e-05
14	2.594e-05	1.93e-05	2.756e-05	1.78e-05	3.465e-05	0.00053864	9.084e-05	2.472e-05	2.364e-05	2.867e-05	2.767e-05	2.876e-05	2.662e-05	2.369e-05	2.615e-05	1.789e-05	3.482e-05	3.156e-05	2.021e-05	2.728e-05	1.928e-05	2.03e-05	2.014e-05	2.303e-05	2.485e-05	2.383e-05	3.057e-05	0.00028226	0.00042277	6.186e-05	1.951e-05	1.535e-05	2.305e-05	2.852e-05	3.046e-05	2.631e-05	2.24e-05	2.67e-05	2.584e-05	1.807e-05	3.79e-05	0.00012144	0.00022731	2.358e-05	2.246e-05	2.269e-05	1.983e-05	3.517e-05	4.743e-05
15	2.343e-05	1.479e-05	1.504e-05	1.724e-05	2.75e-05	0.00048703	5.645e-05	2.748e-05	1.951e-05	1.485e-05	1.499e-05	2.074e-05	2.366e-05	2.084e-05	2.075e-05	2.048e-05	2.207e-05	1.767e-05	1.544e-05	1.822e-05	2.129e-05	2.057e-05	2.148e-05	1.712e-05	2.504e-05	2.089e-05	1.324e-05	0.00031434	0.00038935	3.578e-05	1.951e-05	1.974e-05	1.599e-05	1.768e-05	2.574e-05	2.434e-05	1.834e-05	2.783e-05	1.649e-05	1.621e-05	1.838e-05	0.00037702	0.00011555	3.034e-05	7.351e-05	1.989e-05	2.386e-05	1.863e-05	6.359e-05
16	2.373e-05	1.389e-05	1.724e-05	1.334e-05	3.866e-05	0.00047263	6.588e-05	1.263e-05	1.61e-05	1.579e-05	1.221e-05	1.809e-05	1.04e-05	1.74e-05	1.937e-05	1.989e-05	1.526e-05	2.863e-05	1.785e-05	1.533e-05	1.473e-05	1.667e-05	1.129e-05	1.633e-05	1.503e-05	2.251e-05	1.665e-05	0.00031701	0.0003996	4.056e-05	1.346e-05	2.108e-05	1.606e-05	1.894e-05	1.631e-05	1.376e-05	1.692e-05	2.14e-05	1.552e-05	2.407e-05	1.936e-05	8.619e-05	0.0004551	2.998e-05	4.437e-05	2.321e-05	1.903e-05	1.605e-05	3.861e-05
31	1.529e-05	1.38e-05	1.792e-05	1.284e-05	2.373e-05	0.00041714	4.612e-05	1.217e-05	1.022e-05	1.786e-05	1.256e-05	1.73e-05	1.481e-05	1.181e-05	1.351e-05	8.01e-06	1.368e-05	1.526e-05	1.435e-05	1.639e-05	1.387e-05	1.364e-05	1.242e-05	1.136e-05	2.006e-05	1.665e-05	2.091e-05	0.00027099	0.00032422	3.274e-05	2.193e-05	1.409e-05	1.828e-05	1.438e-05	2.867e-05	4.056e-05	1.111e-05	1.554e-05	1.575e-05	1.567e-05	1.659e-05	0.00023577	0.00015112	2.202e-05	3.262e-05	1.938e-05	1.622e-05	1.289e-05	3.368e-05
32	1.339e-05	1.081e-05	1.107e-05	1.186e-05	2.943e-05	0.00063702	9.478e-05	2.084e-05	1.208e-05	1.325e-05	1.002e-05	1.067e-05	1.592e-05	1.362e-05	8.57e-06	1.457e-05	2.706e-05	1.036e-05	1.767e-05	1.358e-05	1.421e-05	1.73e-05	1.359e-05	1.638e-05	1.233e-05	1.454e-05	2.522e-05	0.00039521	0.00050956	5.249e-05	1.248e-05	1.726e-05	1.528e-05	1.318e-05	1.839e-05	1.158e-05	1.093e-05	1.56e-05	1.687e-05	1.16e-05	9.06e-06	1.911e-05	0.00024986	0.00010905	1.807e-05	2.617e-05	1.543e-05	1.14e-05	2.979e-05
33	1.411e-05	1.28e-05	1.265e-05	1.876e-05	2.531e-05	0.00049374	7.449e-05	1.745e-05	1.626e-05	1.516e-05	1.757e-05	1.528e-05	9.7e-06	1.204e-05	1.437e-05	1.081e-05	1.375e-05	1.245e-05	1.508e-05	7.32e-06	1.253e-05	1.092e-05	1.194e-05	1.409e-05	1.343e-05	1.157e-05	1.703e-05	0.00027086	0.00033913	3.787e-05	1.219e-05	1.147e-05	1.386e-05	1.216e-05	2.01e-05	2.603e-05	1.812e-05	1.83e-05	1.807e-05	1.37e-05	1.5e-05	2.165e-05	0.00010775	0.00023697	1.828e-05	3.126e-05	1.277e-05	1.11e-05	2.792e-05
34	1.661e-05	1.52e-05	2.226e-05	1.304e-05	4.337e-05	0.00051584	7.013e-05	1.348e-05	1.522e-05	1.303e-05	1.658e-05	1.72e-05	1.755e-05	1.32e-05	1.617e-05	1.472e-05	1.541e-05	1.348e-05	1.617e-05	1.658e-05	1.338e-05	1.718e-05	1.142e-05	1.271e-05	1.283e-05	1.677e-05	2.855e-05	0.00026477	0.00034654	3.964e-05	1.677e-05	1.889e-05	2.008e-05	2.211e-05	1.907e-05	2.077e-05	1.329e-05	1.764e-05	1.497e-05	1.687e-05	1.511e-05	1.926e-05	9.165e-05	0.00018016	3.004e-05	3.643e-05	2.401e-05	2.027e-05	4.09e-05
36	1.235e-05	1.214e-05	1.254e-05	1.305e-05	2.71e-05	0.00050099	7.729e-05	1.648e-05	1.425e-05	1.368e-05	1.876e-05	1.531e-05	1.323e-05	1.505e-05	1.355e-05	1.569e-05	1.865e-05	1.709e-05	1.781e-05	1.522e-05	1.097e-05	1.35e-05	2.007e-05	2.114e-05	1.184e-05	1.454e-05	1.714e-05	0.00028243	0.000406	4.708e-05	1.306e-05	1.188e-05	2.403e-05	1.668e-05	3.17e-05	2.25e-05	1.401e-05	1.352e-05	1.387e-05	1.271e-05	1.401e-05	1.637e-05	5.1e-05	0.00038332	2.679e-05	2.53e-05	3.512e-05	2.541e-05	4.848e-05
37	1.443e-05	1.786e-05	1.561e-05	2.104e-05	2.313e-05	0.00048656	6.564e-05	1.574e-05	1.835e-05	1.546e-05	1.361e-05	1.371e-05	1.331e-05	1.589e-05	2.13e-05	1.679e-05	1.867e-05	1.509e-05	1.913e-05	1.715e-05	1.621e-05	1.63e-05	1.446e-05	1.641e-05	1.82e-05	1.128e-05	2.09e-05	0.0002723	0.00033239	4.678e-05	1.716e-05	1.401e-05	1.333e-05	1.558e-05	3.009e-05	1.369e-05	1.618e-05	1.165e-05	1.352e-05	1.626e-05	1.147e-05	2.441e-05	0.00018395	8.687e-05	1.555e-05	2.07e-05	1.364e-05	1.793e-05	3.1e-05
51	2.417e-05	2.621e-05	1.947e-05	2.374e-05	3.989e-05	0.00067468	0.00012336	2.815e-05	3.474e-05	2.634e-05	3.908e-05	1.951e-05	2.951e-05	3.031e-05	2.82e-05	2.834e-05	2.893e-05	2.479e-05	2.818e-05	2.863e-05	2.704e-05	3.192e-05	2.601e-05	3.486e-05	3.391e-05	2.677e-05	2.571e-05	0.00036113	0.00054563	7.301e-05	1.985e-05	3.017e-05	2.825e-05	2.814e-05	3.502e-05	3.412e-05	2.291e-05	2.74e-05	3.049e-05	2.944e-05	2.637e-05	0.00016286	0.00019	2.453e-05	3.238e-05	2.223e-05	2.467e-05	2.332e-05	3.719e-05
52	1.405e-05	1.922e-05	1.767e-05	2.587e-05	2.594e-05	0.0006279	8.547e-05	2.5e-05	2.255e-05	3.08e-05	1.696e-05	1.92e-05	1.683e-05	2.126e-05	2.096e-05	1.471e-05	1.687e-05	2.09e-05	2.158e-05	2.187e-05	2.042e-05	1.39e-05	1.24e-05	1.846e-05	1.896e-05	1.853e-05	2.196e-05	0.00032729	0.00043548	5.669e-05	1.581e-05	1.435e-05	1.561e-05	1.831e-05	1.939e-05	2.037e-05	1.641e-05	3.474e-05	1.573e-05	2.34e-05	3.777e-05	0.00066579	3.96e-05	3.729e-05	4.352e-05	1.978e-05	2.312e-05	1.896e-05	5.669e-05
55	2.225e-05	1.566e-05	2.053e-05	2.182e-05	2.648e-05	0.0005725	8.094e-05	1.132e-05	3.161e-05	1.573e-05	1.546e-05	2.736e-05	1.827e-05	1.689e-05	1.982e-05	1.63e-05	1.601e-05	1.566e-05	1.726e-05	1.619e-05	1.855e-05	1.87e-05	1.415e-05	2.684e-05	1.728e-05	1.763e-05	2.368e-05	0.00032611	0.00039418	4.732e-05	1.66e-05	1.373e-05	2.118e-05	1.789e-05	3.466e-05	3.048e-05	3.09e-05	2.125e-05	2.409e-05	2.408e-05	1.686e-05	1.96e-05	0.00012489	0.00057661	3.817e-05	5.286e-05	2.745e-05	2.78e-05	4.695e-05
56	1.331e-05	1.127e-05	1.493e-05	1.567e-05	2.276e-05	0.00048278	7.699e-05	1.097e-05	1.411e-05	1.112e-05	1.138e-05	8.82e-06	1.089e-05	1.139e-05	1.062e-05	1.483e-05	1.72e-05	1.354e-05	7.83e-06	7.4e-06	9.74e-06	1.374e-05	1.172e-05	1.11e-05	1.319e-05	1.025e-05	1.542e-05	0.00027182	0.00034922	4.933e-05	1.443e-05	1.013e-05	1.36e-05	1.051e-05	3.137e-05	4.097e-05	1.213e-05	1.095e-05	1.674e-05	9.68e-06	8.92e-06	1.317e-05	1.298e-05	0.00018175	0.00017042	1.342e-05	3.148e-05	1.527e-05	3.505e-05
57	1.902e-05	1.453e-05	1.019e-05	2.479e-05	2.433e-05	0.00039667	6.774e-05	1.181e-05	1.109e-05	1.043e-05	1.288e-05	1.903e-05	1.463e-05	1.277e-05	2.234e-05	1.809e-05	1.464e-05	1.072e-05	1.568e-05	1.579e-05	1.624e-05	1.155e-05	1.913e-05	1.32e-05	1.559e-05	1.96e-05	1.91e-05	0.00019431	0.00025689	2.843e-05	1.584e-05	1.906e-05	1.665e-05	2.335e-05	2.991e-05	2.744e-05	2.195e-05	1.287e-05	1.778e-05	1.482e-05	1.309e-05	2.119e-05	0.00010828	0.00023272	2.187e-05	2.641e-05	2.132e-05	1.572e-05	3.065e-05
59	1.675e-05	1.654e-05	1.096e-05	1.268e-05	3.124e-05	0.00058161	8.169e-05	1.92e-05	2.355e-05	1.82e-05	1.7e-05	1.564e-05	1.349e-05	1.425e-05	1.402e-05	2.075e-05	1.859e-05	1.918e-05	2.007e-05	1.327e-05	1.729e-05	1.714e-05	1.606e-05	2.251e-05	2.115e-05	2.017e-05	1.764e-05	0.00033356	0.00042701	4.456e-05	2.137e-05	2.185e-05	1.763e-05	1.633e-05	2.88e-05	2.726e-05	1.297e-05	1.784e-05	1.392e-05	1.701e-05	1.746e-05	2.844e-05	0.00035241	5.235e-05	2.372e-05	2.528e-05	2.386e-05	1.132e-05	3.733e-05
[truncated: 708 more columns]
