# Supplementary material for: Proton NMR Enables the Absolute Quantification of Aqueous Metabolites and Lipid Classes in Unique Mouse Liver Samples
Source: Metabolites. 2019 Dec 21;10(1):9. doi: 10.3390/metabo10010009 (PMC7023327; doi:10.3390/metabo10010009)
Supplement: Supplementary file 1 [file metabolites-10-00009-s001.zip › TableS7.xlsx]

## Sheet: export_bucket_foie_lip_HG_30081
Sample	6.395	6.385	6.375	6.365	6.355	6.345	6.335	6.325	6.315	6.305	6.295	6.285	6.275	6.265	6.255	6.245	6.235	6.225	6.215	6.205	6.195	6.185	6.175	6.165	6.155	6.145	6.135	6.125	6.115	6.105	6.095	6.085	6.075	6.065	6.055	6.045	6.035	6.025	6.015	6.005	5.995	5.985	5.975	5.965	5.955	5.945	5.935	5.925	5.915
11	2.49e-06	2.93e-06	2.1e-06	1.73e-06	2.58e-06	6.01e-06	1.83e-06	1.8e-06	2.28e-06	1.638e-05	2.036e-05	8.33e-06	2.348e-05	7.99e-06	1.139e-05	1.9e-05	2.586e-05	8.88e-06	1.699e-05	1.864e-05	1.225e-05	1.403e-05	3.068e-05	1.102e-05	2.76e-06	5.63e-06	6.32e-06	3.658e-05	1.963e-05	2.352e-05	2.35e-05	1.182e-05	3.74e-06	7.09e-06	5.95e-06	3.4e-06	4.03e-06	5.34e-06	8.79e-06	4.4e-06	6.71e-06	3.21e-06	4.5e-06	4.5e-06	4.62e-06	9.2e-06	7.23e-06	5.78e-06	1.358e-05
12	3.57e-06	3.17e-06	3.85e-06	4.77e-06	5.54e-06	5.81e-06	4.39e-06	5.73e-06	7.13e-06	2.098e-05	2.181e-05	1.049e-05	2.665e-05	1.331e-05	1.849e-05	2.448e-05	2.755e-05	9.68e-06	1.88e-05	2.062e-05	1.388e-05	1.626e-05	3.388e-05	1.229e-05	2.3e-06	9.76e-06	1.263e-05	3.858e-05	2.351e-05	2.685e-05	2.749e-05	1.476e-05	9.83e-06	1.023e-05	9.07e-06	6.51e-06	7.22e-06	9.52e-06	1.107e-05	3.54e-06	9.24e-06	6.91e-06	8.12e-06	9.99e-06	9.43e-06	1.629e-05	1.125e-05	1.063e-05	1.758e-05
13	6.31e-06	7.85e-06	7.86e-06	5.34e-06	5.75e-06	4.01e-06	4.11e-06	3.8e-06	4.43e-06	1.436e-05	1.775e-05	3.27e-06	2.281e-05	2.87e-06	5.68e-06	1.534e-05	2.497e-05	3.12e-06	1.638e-05	2.082e-05	8.66e-06	1.29e-05	3.122e-05	9.06e-06	1.515e-05	4.85e-06	4.13e-06	3.554e-05	1.454e-05	1.808e-05	1.994e-05	9.24e-06	1.9e-06	3.01e-06	2.7e-06	5.88e-06	4.3e-06	3.35e-06	1.16e-05	9.99e-06	4.79e-06	8.21e-06	7.96e-06	3.77e-06	7.79e-06	5.24e-06	3.98e-06	7.94e-06	7.59e-06
14	3.08e-06	3.7e-06	2.67e-06	3.79e-06	2.03e-06	1.6e-06	2.79e-06	2.1e-06	2.17e-06	1.303e-05	1.715e-05	7.3e-06	1.988e-05	6.16e-06	9.3e-06	1.409e-05	2.229e-05	3.93e-06	1.324e-05	1.621e-05	9.88e-06	1.282e-05	2.669e-05	6.47e-06	5.05e-06	2.58e-06	4.6e-06	2.962e-05	1.311e-05	2.061e-05	1.904e-05	8.61e-06	3.73e-06	3.57e-06	2.76e-06	2.31e-06	2.42e-06	3.96e-06	4.69e-06	4.4e-06	4.79e-06	2.87e-06	3.04e-06	3.71e-06	2.54e-06	3.95e-06	4.76e-06	2.08e-06	8.51e-06
15	3.03e-06	2.69e-06	1.79e-06	1.97e-06	1.85e-06	3.28e-06	2.62e-06	5.14e-06	8.11e-06	1.349e-05	1.725e-05	5.33e-06	1.896e-05	9.09e-06	1.463e-05	2.027e-05	2.731e-05	8.13e-06	1.825e-05	1.892e-05	9.64e-06	1.262e-05	2.737e-05	8.23e-06	2.16e-06	2.88e-06	8.95e-06	3.087e-05	1.52e-05	1.981e-05	1.859e-05	1.333e-05	9.34e-06	4.76e-06	5.38e-06	2.71e-06	3.99e-06	7.22e-06	9.65e-06	5.79e-06	9.97e-06	6.48e-06	6.49e-06	8.98e-06	9.05e-06	1.33e-05	1.181e-05	1.004e-05	1.59e-05
16	7e-06	4.32e-06	4.93e-06	6.57e-06	6.96e-06	5.22e-06	6.11e-06	3e-06	1.84e-06	1.385e-05	1.798e-05	5.53e-06	2.478e-05	5.17e-06	7.85e-06	1.349e-05	2.017e-05	5.85e-06	1.886e-05	2.6e-05	1.371e-05	1.598e-05	2.988e-05	1.105e-05	5.01e-06	4.24e-06	5.31e-06	3.411e-05	8.42e-06	1.531e-05	2.36e-05	1.954e-05	1.018e-05	2.39e-06	1.86e-06	2.28e-06	2.25e-06	5.88e-06	8.56e-06	6.71e-06	7.67e-06	4.75e-06	4.46e-06	3.89e-06	3.68e-06	6.59e-06	2.97e-06	4.02e-06	1.002e-05
31	7.83e-06	7.43e-06	5.6e-06	3.93e-06	9.8e-06	7.93e-06	6.03e-06	5.79e-06	4.14e-06	1.302e-05	1.346e-05	5.78e-06	1.735e-05	6.39e-06	8.51e-06	1.442e-05	2.475e-05	5.83e-06	2.511e-05	2.353e-05	1.451e-05	1.471e-05	2.628e-05	1.248e-05	9.81e-06	6.7e-06	8.95e-06	2.2e-05	1.021e-05	1.205e-05	2.349e-05	7.96e-06	7.81e-06	4.09e-06	4.37e-06	4.3e-06	3.18e-06	1.158e-05	1.371e-05	8.23e-06	1.316e-05	7.89e-06	4.12e-06	5.19e-06	5.16e-06	6.75e-06	4.07e-06	5.91e-06	2.479e-05
32	4.86e-06	3.93e-06	4.18e-06	3.09e-06	3.26e-06	2.88e-06	3.51e-06	3.66e-06	3.56e-06	1.669e-05	1.825e-05	5.68e-06	2.549e-05	5.13e-06	3.99e-06	6.63e-06	1.535e-05	3.13e-06	2.185e-05	2.543e-05	1.492e-05	1.591e-05	3.57e-05	1.086e-05	5.87e-06	8.86e-06	6.36e-06	3.32e-05	1.419e-05	2.581e-05	2.728e-05	1.243e-05	5.36e-06	4.51e-06	2.78e-06	3.18e-06	3.76e-06	9.57e-06	1.289e-05	8.03e-06	1.391e-05	3.66e-06	3.43e-06	3.16e-06	3.18e-06	2.98e-06	2.16e-06	3.28e-06	1.283e-05
33	2.26e-06	2.15e-06	1.64e-06	3.09e-06	2.24e-06	3.84e-06	4.01e-06	2.82e-06	1.71e-06	1.35e-05	9.85e-06	4.84e-06	1.617e-05	3.48e-06	2.86e-06	6.74e-06	1.625e-05	3.12e-06	1.499e-05	1.339e-05	1.076e-05	1.412e-05	2.371e-05	6.72e-06	5.08e-06	3.11e-06	5.49e-06	2.23e-05	1.274e-05	1.9e-05	2.487e-05	1.305e-05	8.7e-06	3.51e-06	1.56e-06	4.56e-06	6.14e-06	7.03e-06	7.75e-06	9.86e-06	7.5e-06	2.27e-06	1.47e-06	3.5e-06	2.11e-06	2.8e-06	3.26e-06	3.59e-06	1.62e-05
34	3.1e-06	4.81e-06	5.57e-06	3.41e-06	5.64e-06	3.22e-06	3.46e-06	3.8e-06	6.44e-06	1.521e-05	1.615e-05	5.47e-06	1.555e-05	5.93e-06	7.32e-06	9.51e-06	1.765e-05	4.46e-06	1.967e-05	1.774e-05	1.201e-05	1.305e-05	2.449e-05	1.272e-05	8.79e-06	1.059e-05	6.49e-06	2.095e-05	9.09e-06	1.226e-05	1.814e-05	8.38e-06	3.59e-06	2.72e-06	3.56e-06	3.02e-06	4.24e-06	1.112e-05	1.012e-05	5.22e-06	1.012e-05	3.93e-06	4.22e-06	2.78e-06	2.6e-06	3.82e-06	2.88e-06	5.86e-06	2.413e-05
36	3.46e-06	2.81e-06	2.84e-06	3.52e-06	3.63e-06	2.49e-06	2.91e-06	2.01e-06	3.64e-06	1.928e-05	2.264e-05	5.22e-06	2.703e-05	1.272e-05	7.92e-06	3.35e-06	2.176e-05	6.35e-06	2.431e-05	2.925e-05	2.38e-05	2.649e-05	3.963e-05	9.07e-06	4.2e-06	3.57e-06	9.71e-06	4.297e-05	1.801e-05	3.27e-05	3.517e-05	2.261e-05	1.275e-05	5.95e-06	4.4e-06	4.92e-06	4.78e-06	1.101e-05	1.435e-05	1.489e-05	1.155e-05	5.93e-06	3.06e-06	2.3e-06	2.57e-06	3.06e-06	2.58e-06	2.78e-06	1.6e-05
37	3.38e-06	6.65e-06	4.09e-06	1.91e-06	2.99e-06	4.12e-06	3.96e-06	4.27e-06	4.97e-06	1.833e-05	2.032e-05	4.9e-06	2.63e-05	5.83e-06	9.01e-06	1.374e-05	2.06e-05	5.53e-06	2.055e-05	2.67e-05	1.302e-05	1.315e-05	2.924e-05	1.131e-05	7.41e-06	5.88e-06	7.82e-06	3.515e-05	1.415e-05	2.251e-05	2.38e-05	1.233e-05	3.48e-06	4.7e-06	4.07e-06	6.79e-06	4.15e-06	8.13e-06	1.11e-05	1.067e-05	1.064e-05	4.63e-06	5.35e-06	5.55e-06	3.62e-06	3.55e-06	4.24e-06	6.71e-06	1.54e-05
51	6.27e-06	7.45e-06	5.36e-06	2.35e-06	3.8e-06	3.23e-06	4.42e-06	2.9e-06	3.2e-06	1.248e-05	1.654e-05	4.46e-06	2.211e-05	6.2e-06	3.56e-06	6.75e-06	1.533e-05	6.68e-06	2.171e-05	1.962e-05	1.687e-05	1.304e-05	3.055e-05	9.27e-06	9.85e-06	7.98e-06	1.212e-05	3.314e-05	1.466e-05	2.281e-05	2.324e-05	8.84e-06	3.4e-06	4.08e-06	5.99e-06	4.79e-06	5.36e-06	1.145e-05	9.28e-06	7.11e-06	8.78e-06	6.17e-06	3.51e-06	5.17e-06	5.04e-06	3.67e-06	4.7e-06	5.27e-06	2.547e-05
52	5.11e-06	4.7e-06	4.17e-06	3.19e-06	5.81e-06	3.16e-06	3.56e-06	3.86e-06	5.57e-06	3.305e-05	2.373e-05	1.339e-05	4.607e-05	8.14e-06	3.65e-06	6.62e-06	1.86e-05	1.092e-05	3.169e-05	3.603e-05	2.54e-05	2.943e-05	4.55e-05	8.95e-06	7.43e-06	8.81e-06	1.218e-05	4.788e-05	2.477e-05	4.293e-05	4.319e-05	2.27e-05	5.75e-06	4.59e-06	6.26e-06	9.88e-06	9.86e-06	1.568e-05	1.957e-05	1.844e-05	1.916e-05	8.99e-06	4.9e-06	5.33e-06	5.44e-06	2.18e-06	4.81e-06	9.19e-06	3.88e-05
55	7.93e-06	4.81e-06	6.78e-06	4e-06	4.03e-06	2.46e-06	3.3e-06	5.19e-06	6.49e-06	2.122e-05	2.463e-05	1.04e-05	3.431e-05	1.417e-05	1.173e-05	6.17e-06	1.658e-05	6.78e-06	2.623e-05	2.162e-05	1.269e-05	7.68e-06	3.338e-05	8.11e-06	1.119e-05	6.22e-06	5.08e-06	2.711e-05	8.95e-06	2.251e-05	2.799e-05	1.26e-05	3.6e-06	5.45e-06	3.12e-06	5.92e-06	5.88e-06	1.399e-05	1.155e-05	1.716e-05	1.209e-05	4.76e-06	4.76e-06	3.92e-06	4.58e-06	6.56e-06	6.5e-06	7.83e-06	2.917e-05
56	6.06e-06	4.08e-06	2.96e-06	4.5e-06	2.85e-06	2.27e-06	3.73e-06	2.09e-06	3.72e-06	2.283e-05	2.956e-05	1.223e-05	3.943e-05	7.16e-06	4.42e-06	4.51e-06	1.724e-05	8.68e-06	2.247e-05	3.044e-05	2.015e-05	1.682e-05	4.392e-05	8.2e-06	8.94e-06	6.66e-06	9.38e-06	5.156e-05	2.317e-05	4.405e-05	4.819e-05	2.549e-05	8.86e-06	7.12e-06	9.3e-06	5.64e-06	6.88e-06	1.169e-05	1.365e-05	1.606e-05	1.308e-05	4.54e-06	3.26e-06	4.13e-06	3.98e-06	2.89e-06	2.64e-06	4.13e-06	2.337e-05
57	5.04e-06	4.19e-06	3.73e-06	5.11e-06	3.85e-06	3.77e-06	3.58e-06	3.11e-06	3.27e-06	2.251e-05	1.862e-05	7.34e-06	2.73e-05	1.07e-05	7.68e-06	7.11e-06	1.694e-05	8.57e-06	2.569e-05	2.685e-05	1.165e-05	1.543e-05	3.678e-05	9.33e-06	1.198e-05	7.29e-06	1.004e-05	4.004e-05	1.233e-05	2.744e-05	3.653e-05	2.002e-05	4.7e-06	3.5e-06	3e-06	5.69e-06	5.65e-06	1.826e-05	1.463e-05	1.764e-05	1.422e-05	4.73e-06	3.63e-06	5.56e-06	6.74e-06	6.95e-06	6.81e-06	8.92e-06	2.675e-05
59	5.82e-06	2.89e-06	3.61e-06	4.2e-06	3.42e-06	3.93e-06	4.42e-06	3.06e-06	5.5e-06	1.981e-05	1.715e-05	1.17e-05	2.8e-05	6.01e-06	4.99e-06	4.27e-06	2.393e-05	6.49e-06	2.824e-05	2.452e-05	1.796e-05	1.378e-05	2.954e-05	8.58e-06	7.6e-06	8.45e-06	6.58e-06	3.636e-05	9.96e-06	2.579e-05	2.836e-05	1.431e-05	5.07e-06	3.37e-06	3.28e-06	3.73e-06	4.7e-06	1.221e-05	1.843e-05	1.484e-05	1.403e-05	4.34e-06	4.75e-06	2.96e-06	4.01e-06	3.57e-06	4.9e-06	3.39e-06	2.696e-05
[truncated: 503 more columns]
